# Supplementary material for: Characterization of antibody-mediated neutralization directed against the hypervariable region 1 of hepatitis C virus E2 glycoprotein
Source: PubMed Central journal article supplement (PMC3081231; doi:10.1099/vir.0.028092-0), 2011-03
Supplement: supp_92_3_494__1.pdf [file supp_92_3_494__1.pdf]

**Supplementary Table S1.** Anti-HVR1 antibodies neutralize chimeric HCVpp infection

HCVpp harbouring WT H77c E1E2 or H77c E1E2 with the Gla, HG or GH HVR1 (see main text) were incubated with a range of concentrations of anti-HVR1 antibodies and the IC<sub>50</sub> values ( $\mu\text{g ml}^{-1}$ ) were determined as shown.

| Antibody | HCVpp |                  |    |     |
|----------|-------|------------------|----|-----|
|          | H77c  | H77c-<br>GlaHVR1 | HG | GH  |
| AP123    | >30   | 1.5              | 9  | >30 |
| R1020    | 1.5   | 7                | 15 | 2.5 |
| R140     | 15    | 1                | 2  | 20  |
